# Supplementary material
Source: bioRxiv or medRxiv preprint supplement (https://www.medrxiv.org/highwire/filestream/71097/field_highwire_adjunct_files/0/2020.01.06.20016683-1.pdf)
Supplement: Supplementary file [file 2020.01.06.20016683-1.pdf]

## List of Supplemental Materials

### Figure S1. Fluorescence-activated cell sorting (FACS) of CSF-CTCs from LUAD-LM patient samples.

CTCs lack CD45 (APC-A) expression and its FSC-H is larger than normal leukocytes. Calcein Blue AM (UltraViolet-A excitation) was used to select live cells.

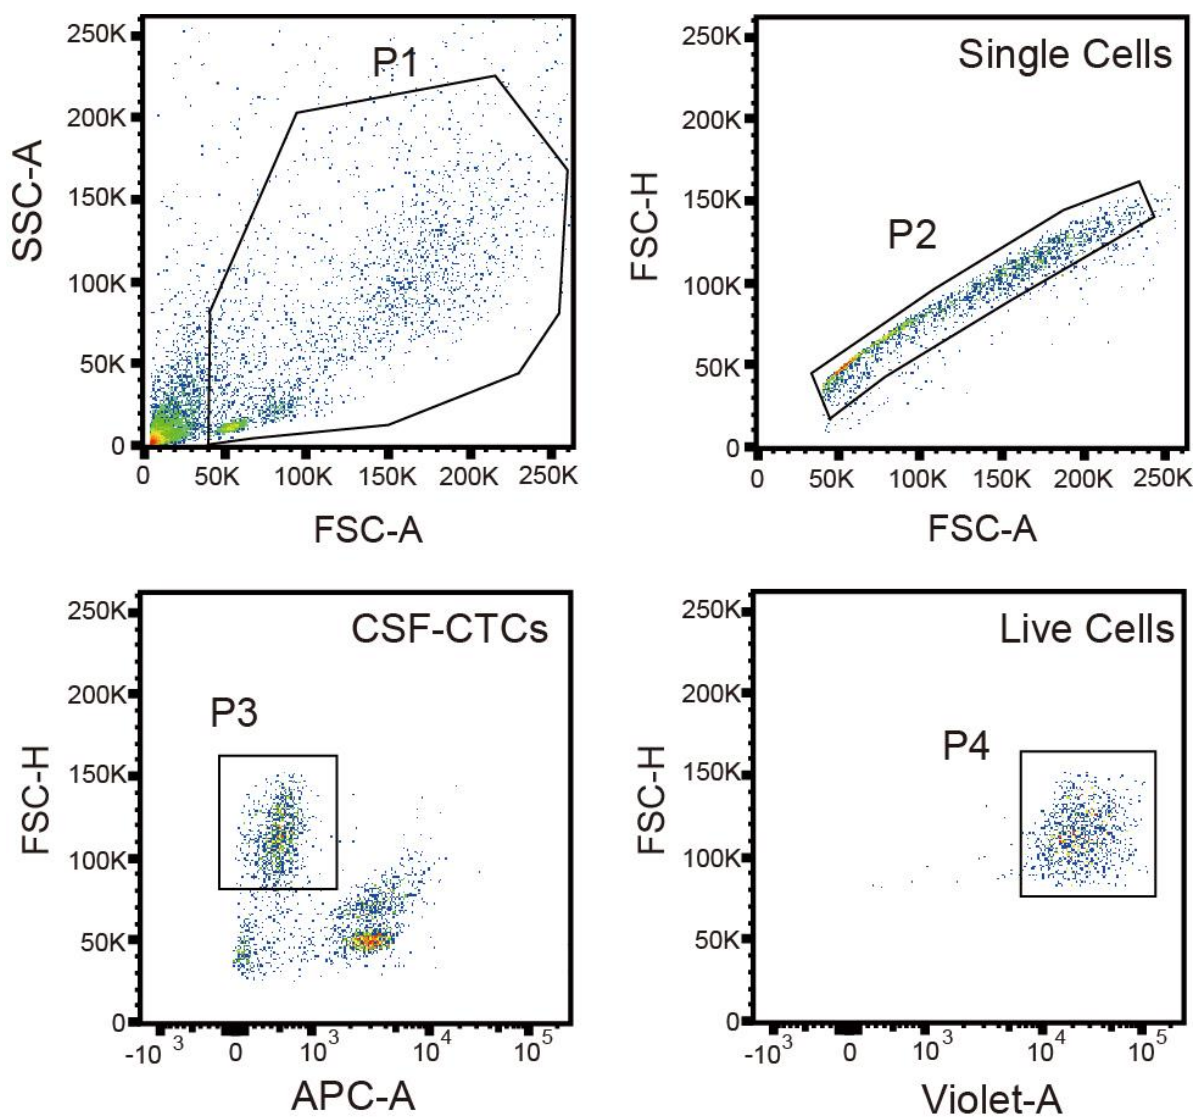

**Figure S2. Single-cell expression profile of specific marker genes in control samples on the t-SNE feature plots.**

Clustering plot is the same as in Figure 1A. Scaled expression was depicted using a red gradient. Grey denotes lack of expression. Leukocyte marker: *PTPRC*; T cell markers: *CD2*, *CD3D*, *CD3E*, *CD3G*; B cell markers: *CD19*, *MS4A1*, *CD17A*, *CD79B*, Monocyte markers: *CD14*, *CD68* and *CD163*.

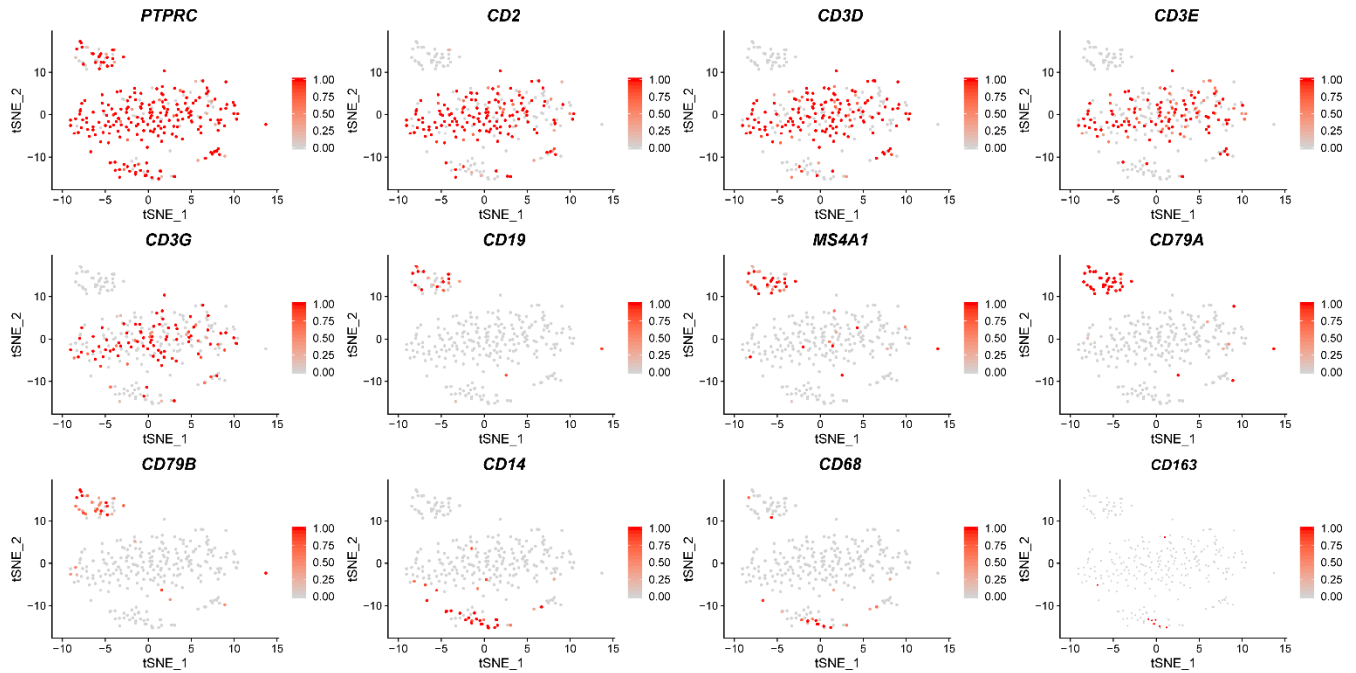

**Figure S3. t-SNE plot of LUAD-LM patients CSF-CTCs single-cell transcriptome profiles.**

(A). t-SNE plots of CSF-CTC clustering of five LUAD-LM CSF samples with a minimum number of covered genes of 1,000.

(B). Three covered genes number groups (1000~1999, 2000~2999, and 3000~3999) are highlighted for each cell in the t-SNE plot in Figure S3A.

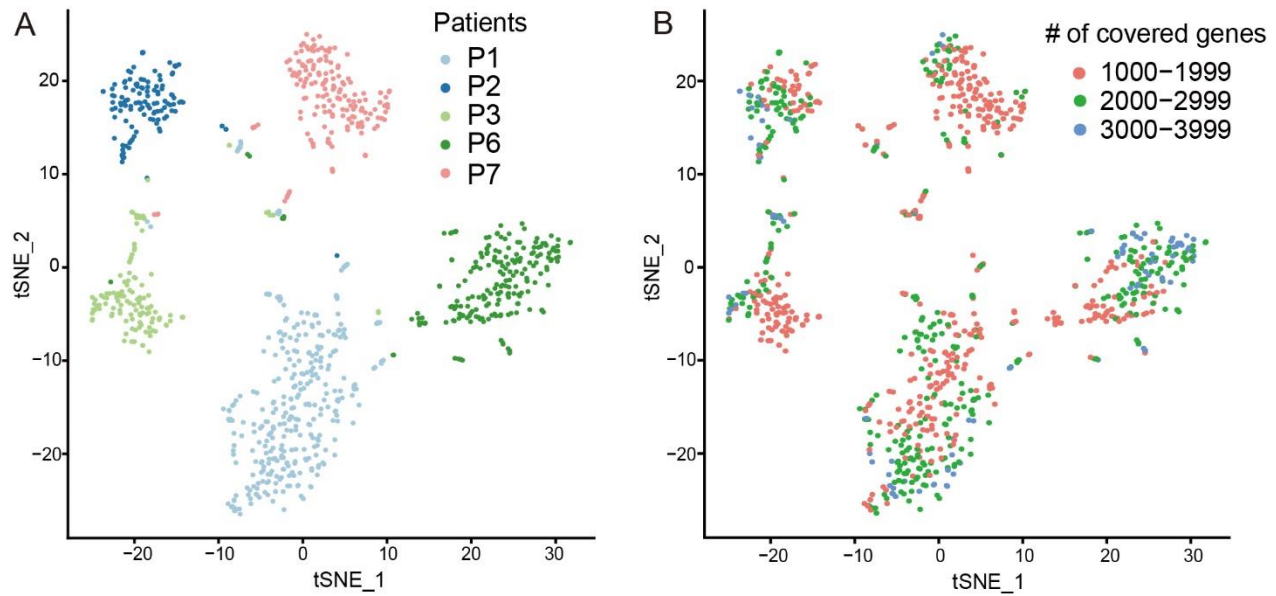

**Figure S4. t-SNE plot of gene expression clustering of patient P3 with nine other CSF samples.**

t-SNE clustering plot of patient P3 with normal CSF samples (N1, N2 and N3) and LUAD-LM CSF samples (P1, P2, P4, P6 and P7). LUAD-LM patient P3 CSF sample was processed following the protocol in Figure 1A without CD45 negative cell selection. Potential CTCs were manually selected based only on cell morphology. Cell identity analysis revealed that all cells collected from P3 CSF sample are monocytes.

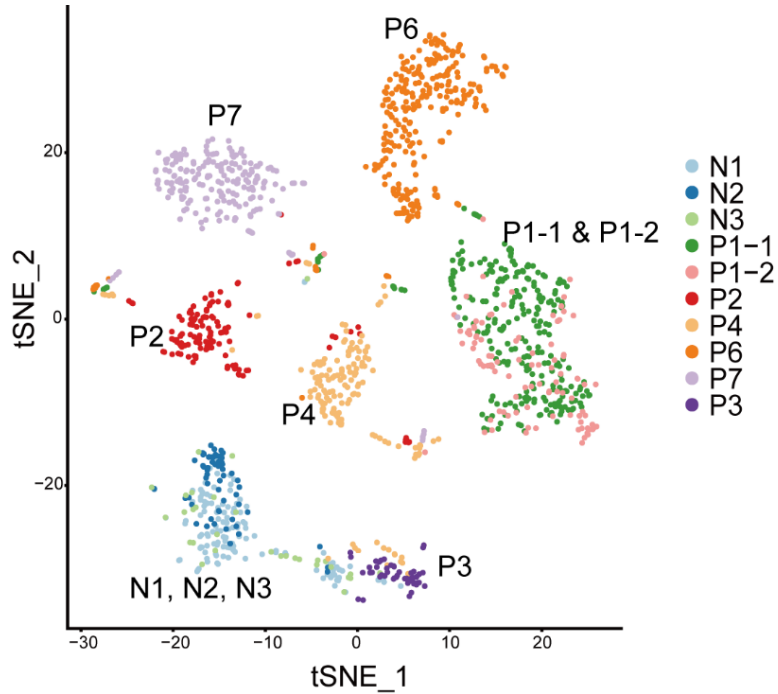

**Figure S5. Characterization of the single-cell gene expression profile across all cells in CSF samples for selected marker genes.**

Feature plots demonstrating the expression of the following selected genes on the t-SNE plot (Figure 2A). Scaled expression levels are depicted using a red gradient (grey denotes lack of expression).

Immune marker genes: *PTPRC*, *CD2*, *CD3D*, *CD3E*, *CD3G*, *CD14*, *CD68* and *CD163*. Lung associated genes: *SFTPA1*, *SFTPA2*, *SFTPB* and *NAPSA*. Epithelial marker genes: *EPCAM*, *CDH1*, *KRT7*, *KRT8*, *KRT17*, *KRT18*, *KRT19* and *MUC1*. Cell cycle associated genes: *CCND1* and *TOP2A*.

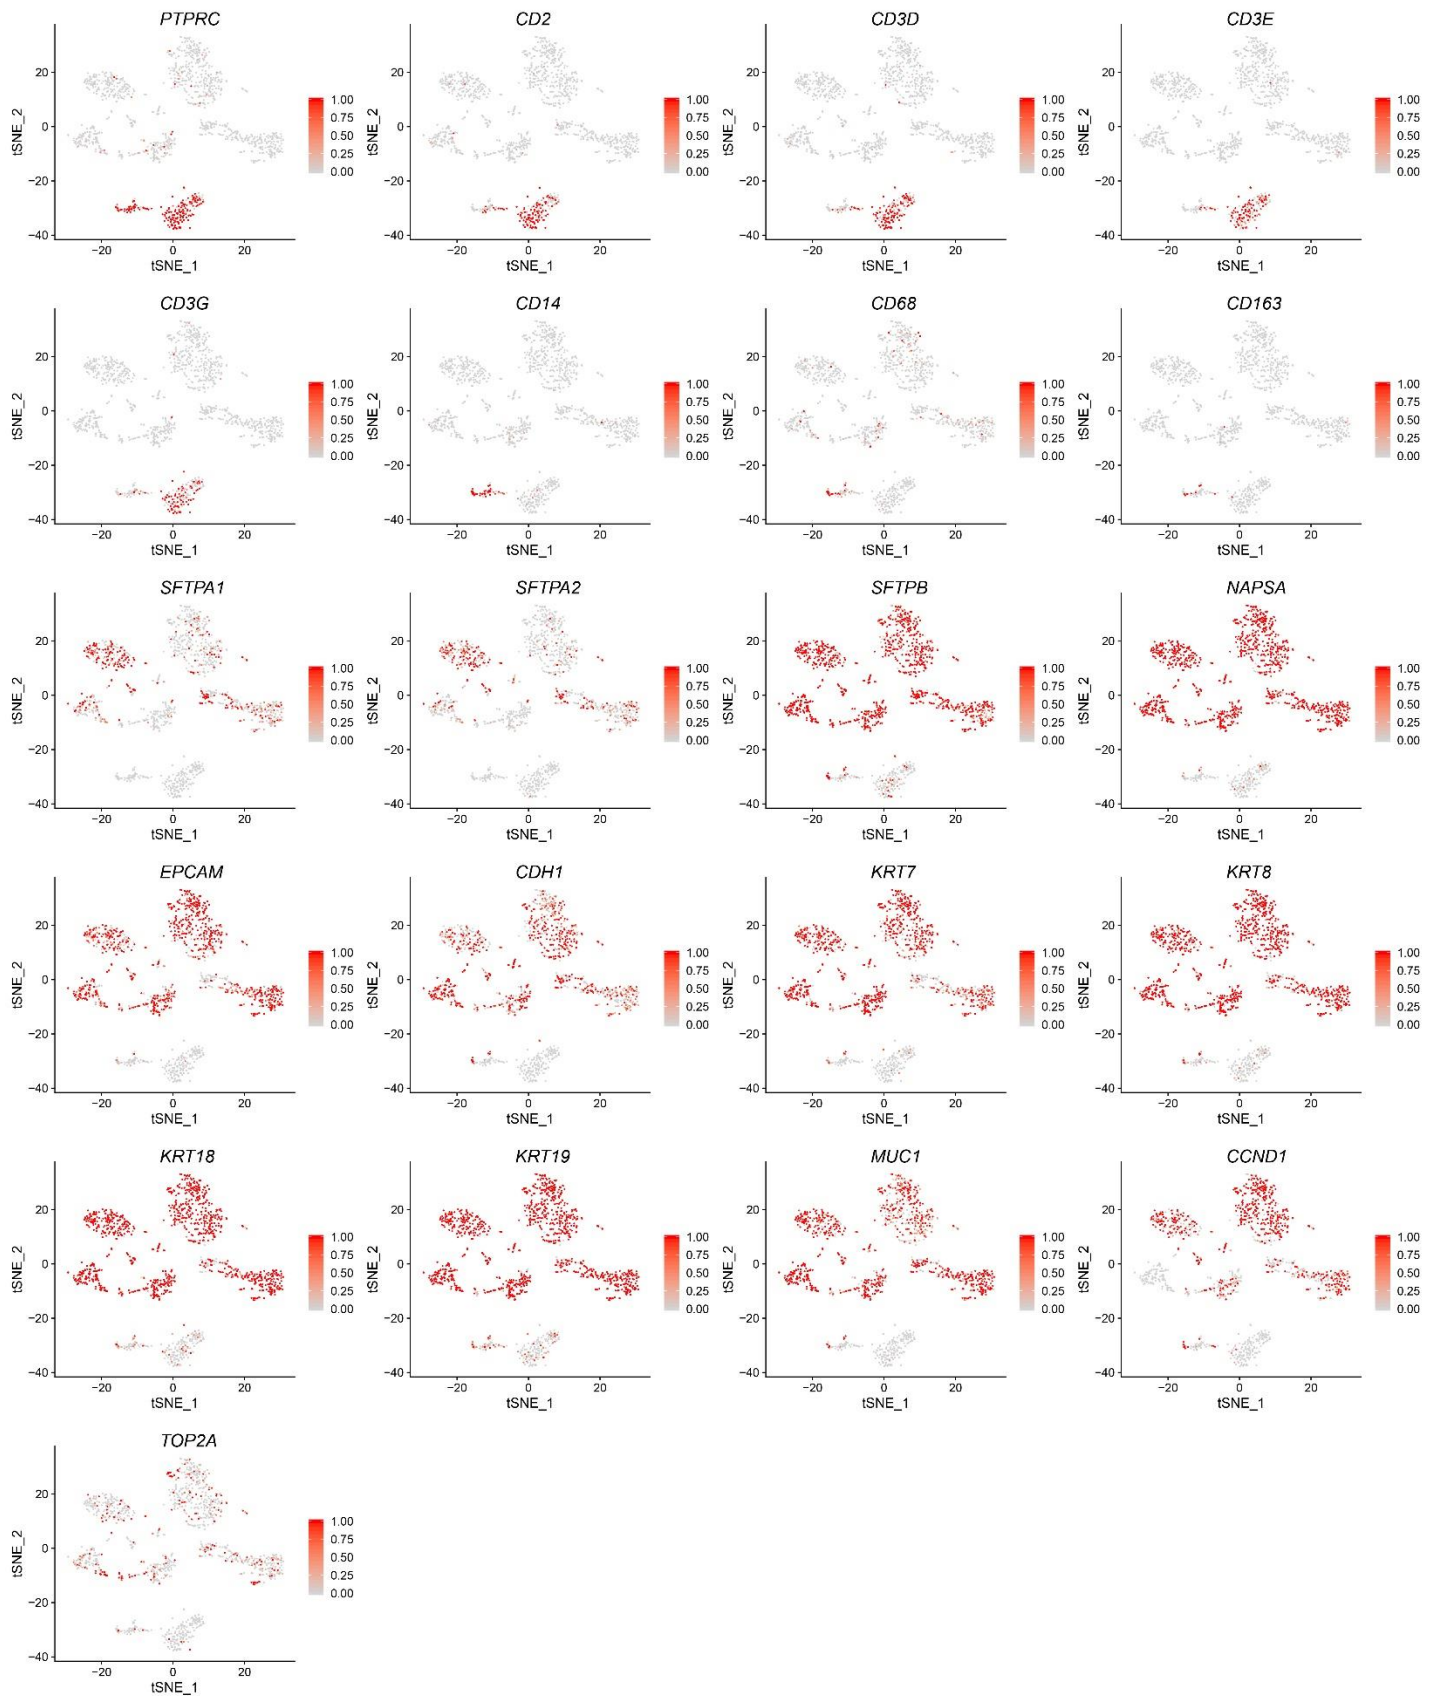

**Figure S6. Inference of Cell cycle state in CSF-CTCs of LUAD-LM patients, H358 cell line and two PDX samples.**

(A). Estimation of the cell cycle state of individual CTCs (dots) in P2, P6, P7, H358 cell line and two PDX samples (MBT15 and PT45) based on the relative expression of G1/S (x axis) and G2/M (y axis) gene sets. Cells are colored by their inferred cell cycle states: cycling cells (score > 0.2), red; intermediate (0 < score ≤ 0.2), pink; and noncycling cells (score ≤ 0), gray.

(B) Summary of cell cycle state proportions (y-axis) enriched in each sample (x-axis). The color code is consistent with in Figure S6A.

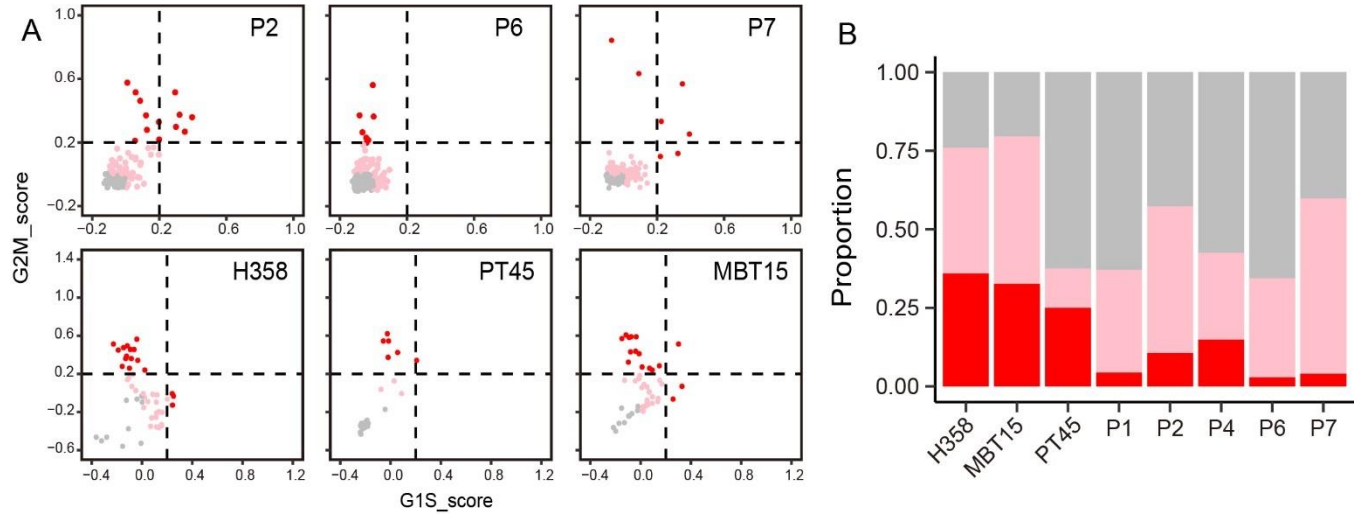

**Figure S7. Single-cell gene expression profiles in CSF samples for cancer stem cell (CSC) biomarkers.**

Feature plots demonstrating the expression of CSC markers (*PROM1*, *CD44*, *ALDH1A1*, *ALDH1A3* and *ALDH3A1*) on the t-SNE plot (Figure S3A). Scaled expression levels are depicted using a red gradient (grey stands for lack of expression).

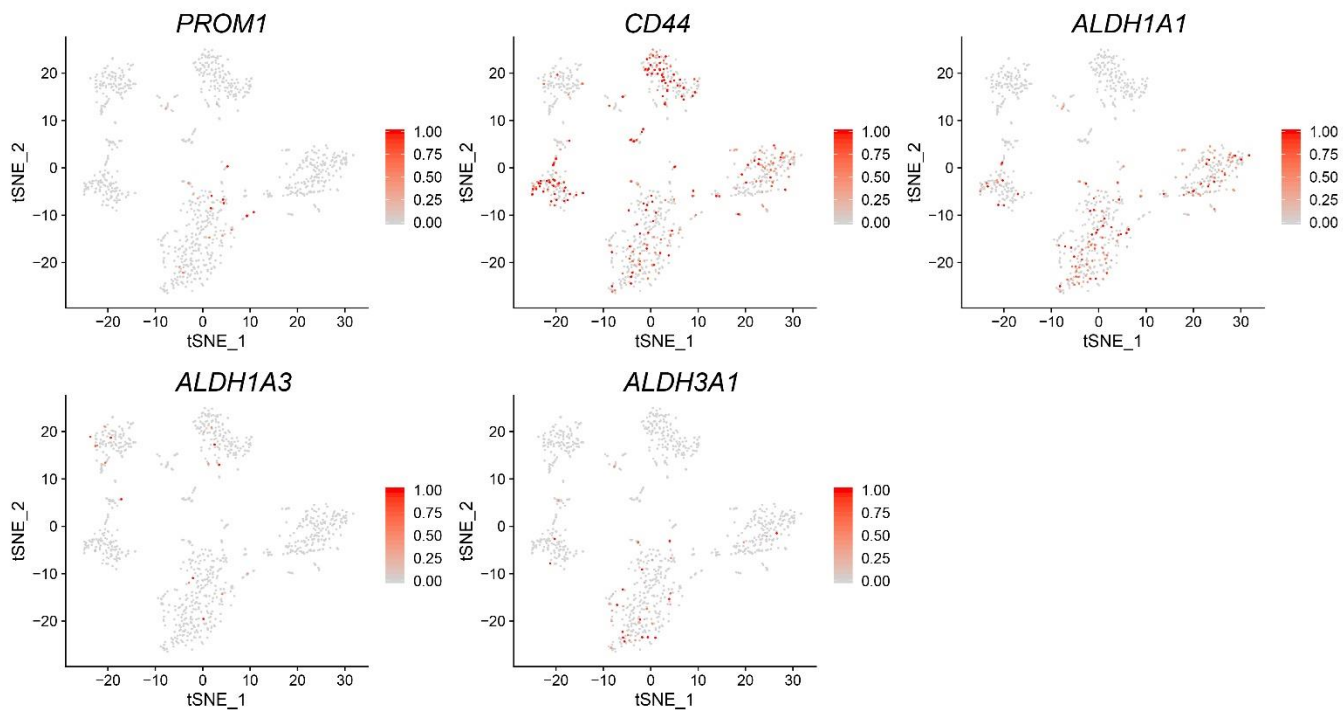



**Figure S8. The epithelial, mesenchymal/CSC and extracellular matrix characteristics in CSF-CTCs from patient P2, P6 and P7.**

Unsupervised clustering based on GSVA score (*top panels*) and average normalized expression level (*bottom panels*) of epithelial gene set, mesenchymal/CSC gene set and extracellular matrix gene set in CSF-CTCs from patient P2, P6 and P7. The gene sets are consistent with in Figure 4B.

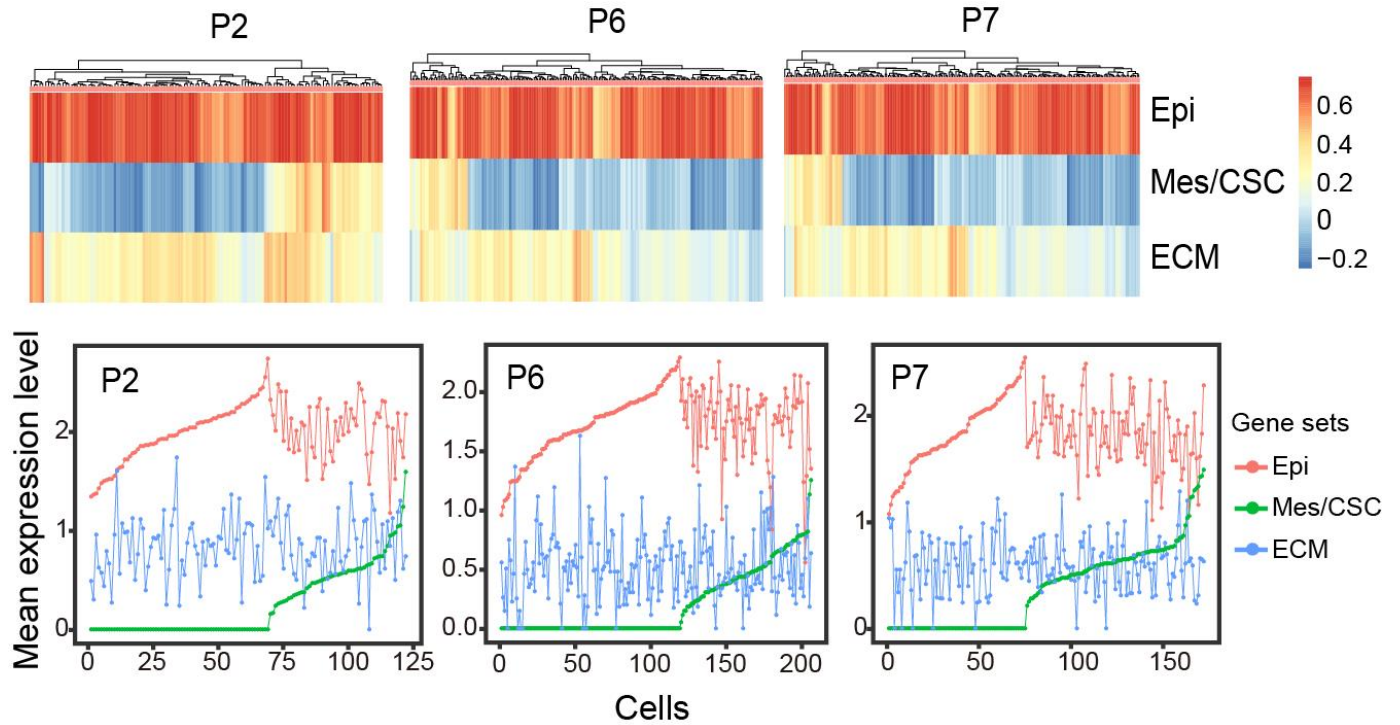

**Figure S9. Heatmap of single-cell expression profile of cancer-testis antigens (CTAs) in CSF-CTCs from five LUAD-LM patients.**

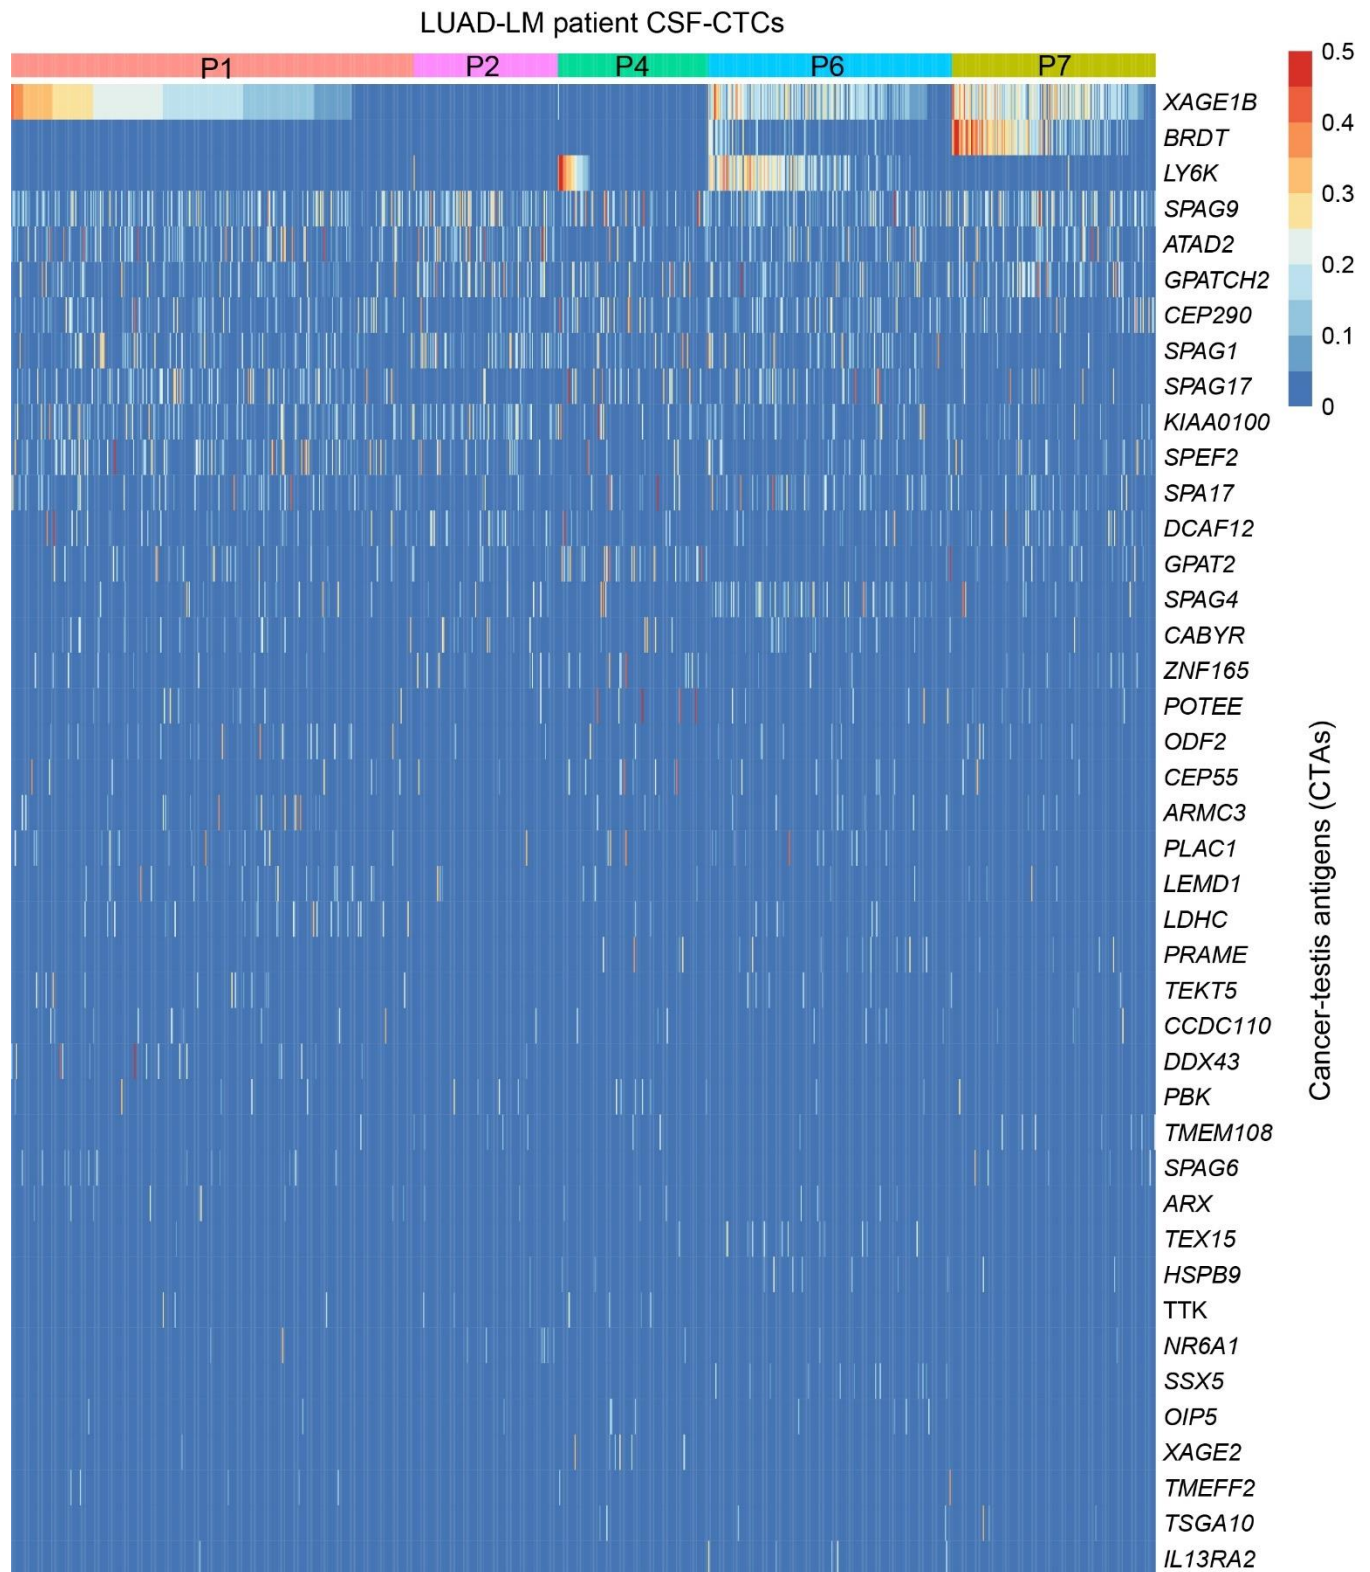

**Figure S10. Clinic characteristics of CUP patient P8.**

(A) Brain MRI results of patient P8, demonstrating leptomeningeal enhancement, especially in cerebellum (red arrows).

(B-I) H-E staining (B) and immunohistochemistry (IHC) of left lymph nodes biopsy for epithelial markers CK pan+, CK7+, CK8+, CK18+, CK19+, MUC1+ (C), lung cancer markers NAPSAs-, TTF1-, P63-, synaptophysin/SYP- (D), apocrine gland marker PIP/GCDFP15+ (E), proliferation marker MKI67/KI67+/- (F), gastrointestinal cancer marker VIL1/Villin- (G), prostate cancer KLK3/PAS- (H), and liver cancer marker GPC3-/Glypican- (I). "+": positive, "-": negative, "+/-": partly positive, scale bar represents 200  $\mu$ m.

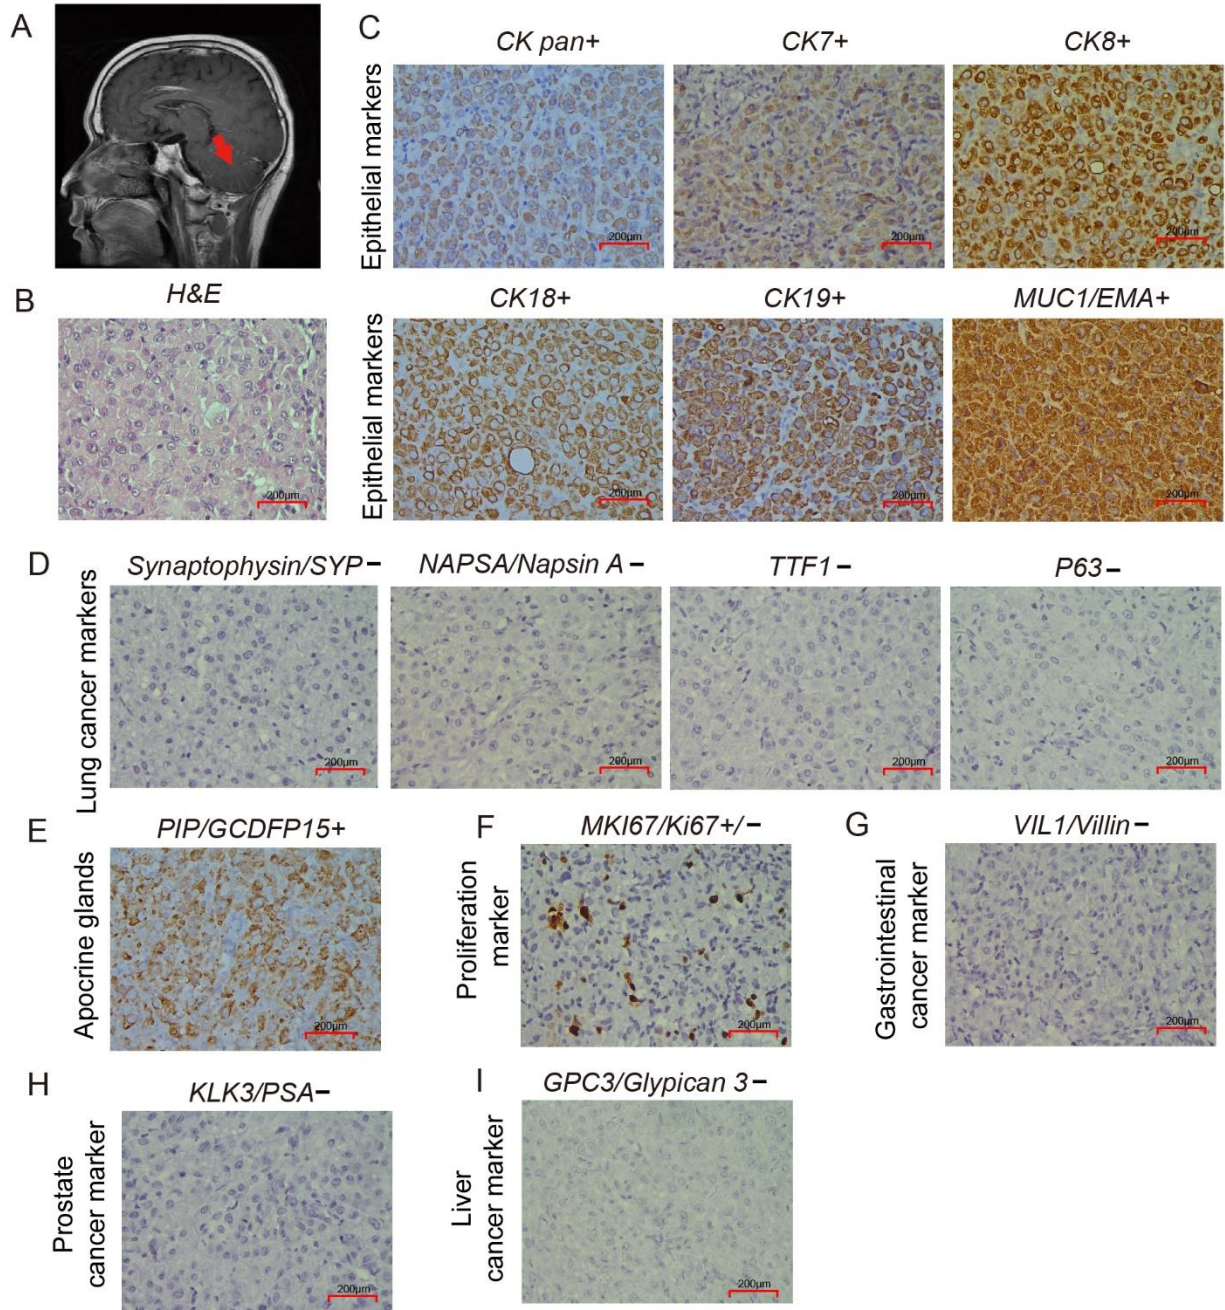



**Figure S11. The gene expression profile of P8 CSF-CTCs compared to leukocytes and LUAD-LM CSF-CTCs.**

(A-B) Volcano plot of significant differential gene expression (adjust  $P$ -value  $< 0.05$ ) between P8 CSF-CTCs and leukocytes (A), and between P8 CSF-CTCs and LUAD-LM CSF-CTCs (B). Up-regulated (**up**) and down-regulated (**down**) genes are defined using a fold-change cutoff of 2. Gene names are labeled for selected genes, including important internal reference and marker genes. Candidate P8-specific genes (**specific**) are labeled in yellow and they are also included in Figure S12.

(C) Significantly enriched KEGG pathways in P8 CSF-CTCs compared to leukocytes by GSEA analysis (FDR: 0.05-0.20).

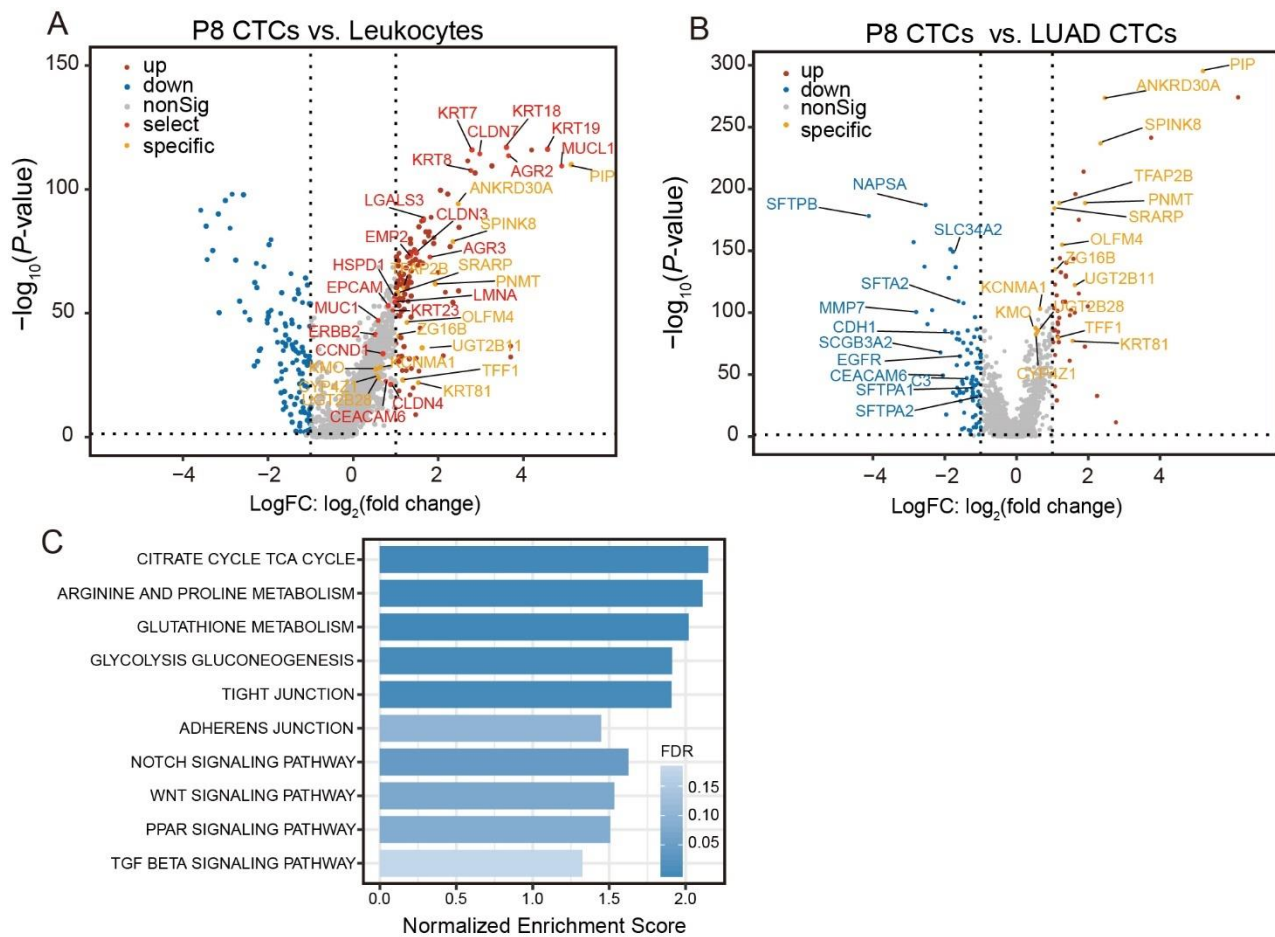

**Figure S12. Characterization of the single-cell gene expression profile across all CSF cells for candidate specific genes of P8 CSF-CTCs.**

Feature plots of the profile of genes with P8-specific expression on the t-SNE plot (Figure 5A). Scaled expression levels are depicted using a red gradient (grey denotes lack of expression).

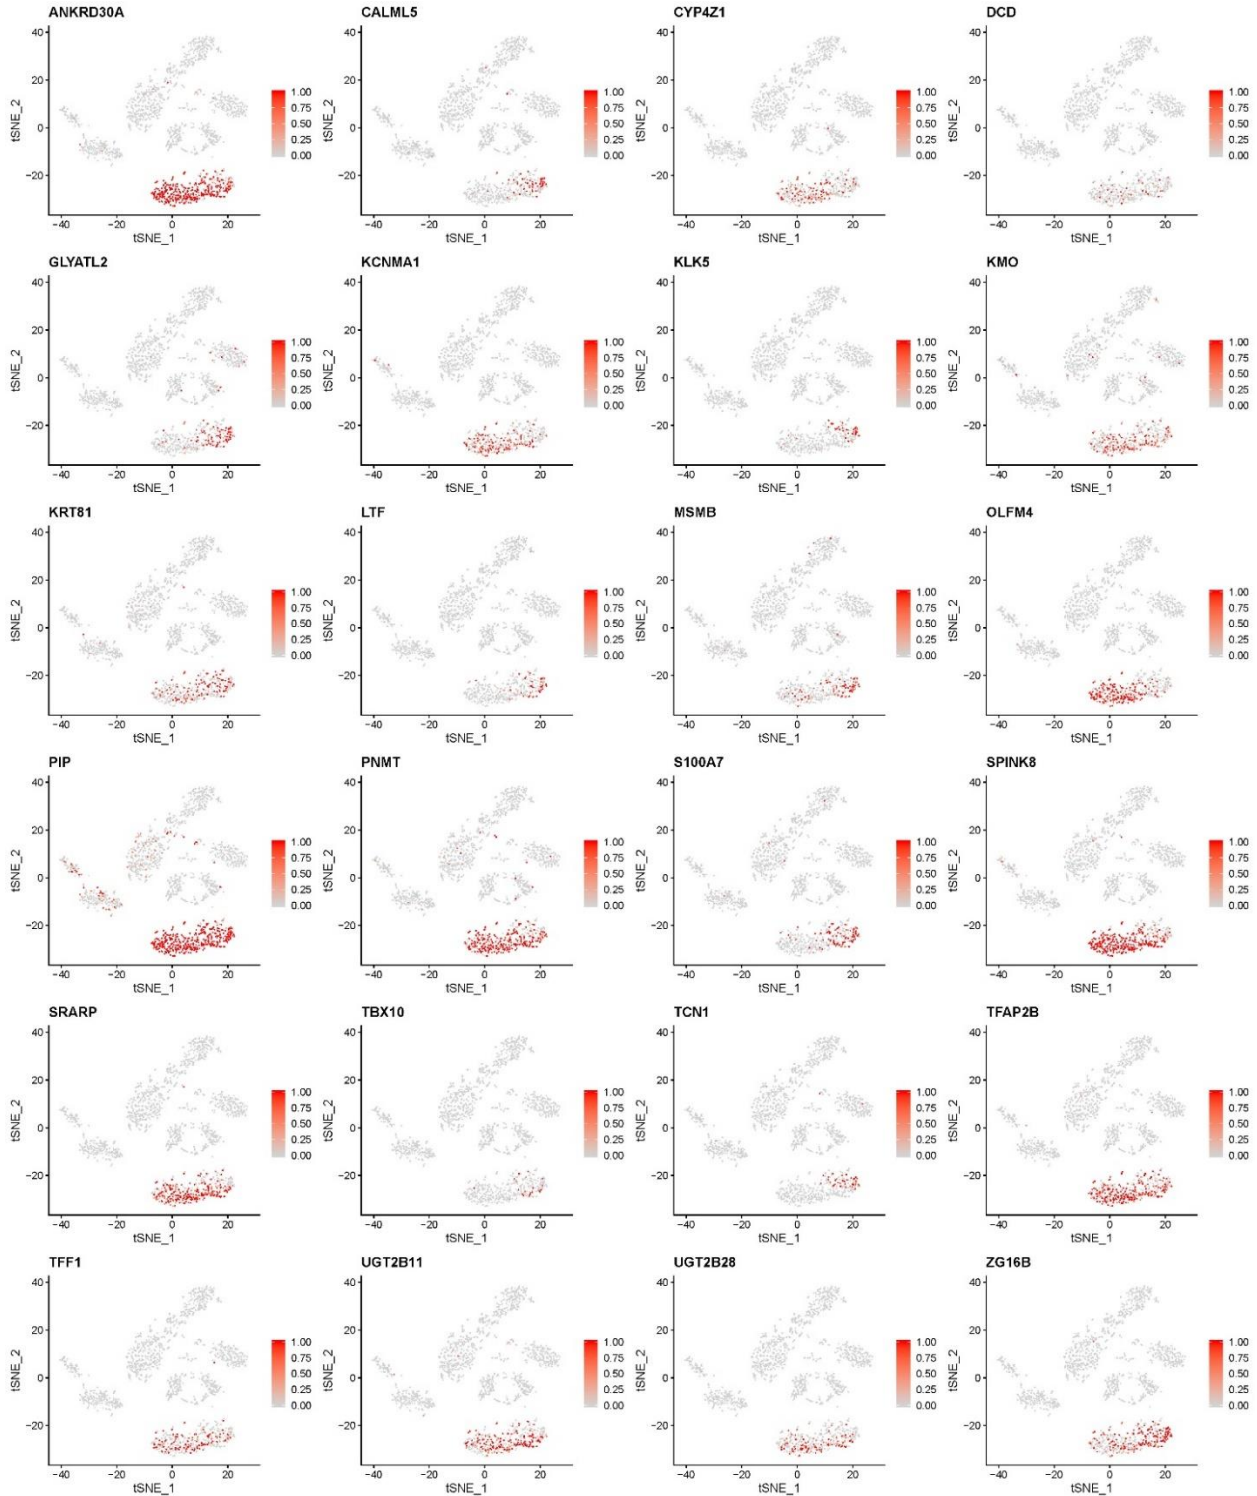

**Figure S13. The expression of epithelial, mesenchymal and CSC (cancer stem cell) genes in LUAD-LM patient CSF-CTCs.**

(A). Scatterplot of average expression value of epithelial genes on the  $x$ -axis and mesenchymal genes on the  $y$ -axis for every LUAD-LM CSF-CTCs. The red cells have high expression of mesenchymal genes with low expression of epithelial genes.

(B). Scatterplot of average expression value of mesenchymal genes on the  $x$ -axis and  $CD44$  on the  $y$ -axis for every LUAD-LM CSF-CTCs.

Epithelial (Epi) genes: *CDH1*, *EPCAM*, *KRT18*, *KRT19*, *KRT7*, *KRT8* and *MUC1*; Mesenchymal (Mes) genes: *FNI* and *VIM*.

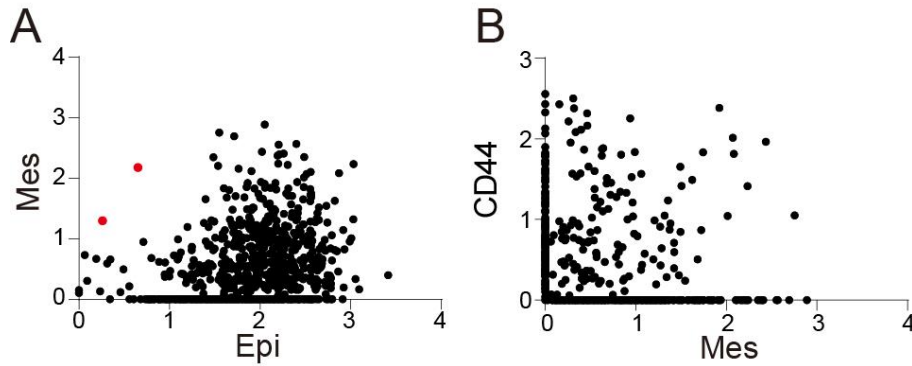

**Table S1. Clinical information and cell selection conditions for CSF and blood samples.**

| Patient ID/info       | Age | Gender | Cancer diagnosis time | LM diagnosis time | Metastatic tumor location in LM by MRI    | Sample collection date | Markers for FACS sorting              | Number of cells sequenced |
|-----------------------|-----|--------|-----------------------|-------------------|-------------------------------------------|------------------------|---------------------------------------|---------------------------|
| <b>P1<br/>LUAD</b>    | 36  | Male   | 11/2017               | 01/2018           | Left frontal lobe,<br>Right parietal lobe | 11/1/2018<br>(P1-1)    | Calcein<br>Blue AM+                   | 168                       |
|                       |     |        |                       |                   |                                           | 1/7/2019<br>(P1-2)     | CD45-                                 | 360                       |
| <b>P2<br/>LUAD</b>    | 62  | Female | Unknown               | 12/2018           | Bilateral temporal lobe                   | 12/17/2018             | Calcein<br>Blue AM+<br>CD45-          | 192                       |
| <b>P4<br/>LUAD</b>    | 65  | Female | 11/2017               | 02/2019           | Cerebellum                                | 3/1/2019               | Calcein<br>Blue AM+<br>CD45-          | 288                       |
| <b>P6<br/>LUAD</b>    | 55  | Male   | 12/2012               | 03/2019           | Bilateral temporal lobe                   | 3/8/2019               | Calcein<br>Blue AM+<br>CD45-          | 480                       |
| <b>P7<br/>LUAD</b>    | 60  | Male   | 07/2017               | 05/2019           | /                                         | 5/10/2019              | Calcein<br>Blue AM+<br>CD45-          | 288                       |
| <b>P3<br/>LUAD</b>    | 49  | Male   | 02/2017               | 02/2018           | Right temporal lobe                       | 3/3/2019               | Calcein<br>Blue AM+                   | 96                        |
| <b>P8<br/>CUP</b>     | 49  | Male   | 12/2017               | 05/2018           | Cerebellum and Cerebral hemisphere        | 1/14/2019<br>(P8-1)    | Calcein<br>Blue AM+                   | 480                       |
|                       |     |        |                       |                   |                                           | 6/21/2019<br>(P8-1)    | CD45                                  | 816                       |
| <b>N1<br/>control</b> | 40  | Male   | N/A                   | N/A               | N/A                                       | 10/8/2018              | Calcein<br>Blue AM+                   | 288                       |
| <b>N2<br/>control</b> | 35  | Female | N/A                   | N/A               | N/A                                       | 10/10/2018             | Calcein<br>Blue AM+                   | 240                       |
| <b>N3<br/>control</b> | 39  | Male   | N/A                   | N/A               | N/A                                       | 10/18/2018             | Calcein<br>Blue AM+                   | 96                        |
| <b>Blood-T cells</b>  | 27  | Female | N/A                   | N/A               | N/A                                       | 1/25/2019              | Calcein<br>Blue AM+<br>CD45+<br>CD3+  | 168                       |
| <b>Blood-B cells</b>  | 27  | Female | N/A                   | N/A               | N/A                                       | 1/25/2019              | Calcein<br>Blue AM+<br>CD45+<br>CD19+ | 168                       |

LUAD: lung adenocarcinoma; CUP: cancer of unknown primary site; LM: leptomeningeal metastases; FACS: fluorescence activating cell sorter; Calcein Blue AM: labeling dye for live cells selection; CD45: protein tyrosine phosphatase receptor type C, marker for leukocytes; CD19: marker for B cells; CD3: marker for T cells; N/A: Not applicable; “/”: no leptomeningeal enhancement shown by MRI.



**Table S2. Summary of cell type identity of CSF samples in normal patients, blood T cell and blood-B cell samples.**

| <b>Sample ID</b> | <b>Total filtered cells</b> | <b>T cells</b> | <b>B cells</b> | <b>Monocytes</b> |
|------------------|-----------------------------|----------------|----------------|------------------|
| N1               | 127                         | 105            |                | 22               |
| N2               | 53                          | 51             |                | 2                |
| N3               | 27                          | 14             |                | 13               |
| Blood-T          | 41                          | 41             |                |                  |
| Blood-B          | 41                          |                | 41             |                  |
| <b>Total</b>     | <b>289</b>                  | <b>211</b>     | <b>41</b>      | <b>37</b>        |

**Table S3. Summary of number of sequenced reads and detected genes of CSF samples in patients, normal patients, blood T cell and blood-B cell samples.**

| <b>Sample ID</b> | <b>Age/Sex</b> | <b>Sequenced reads</b> | <b>Total genes detected</b> | <b># of cells with genes counts &gt; 1000</b> |
|------------------|----------------|------------------------|-----------------------------|-----------------------------------------------|
| P1-1             | 36/Male        | 58,380,064             | 11,655                      | 436                                           |
| P1-2             | 36/Male        | 237,321,692            | 13,813                      | 1,412                                         |
| P2               | 62/Female      | 147,219,734            | 12,893                      | 652                                           |
| P4               | 65/Female      | 350,537,537            | 13,518                      | 1,203                                         |
| P6               | 55/Male        | 302,888,314            | 14,262                      | 1,692                                         |
| P7               | 60/Male        | 94,506,564             | 12,170                      | 371                                           |
| P3               | 49/Male        | 89,980,565             | 9,243                       | 233                                           |
| P8-1             | 49/Male        | 297,958,378            | 13,340                      | 2,012                                         |
| N1               | 40/Male        | 329,258,208            | 13,592                      | 1,332                                         |
| N2               | 35/Female      | 125,071,290            | 10,944                      | 308                                           |
| N3               | 39/Male        | 94,756,214             | 10,101                      | 236                                           |
| Blood-T          | 27/Female      | 105,595,344            | 7,522                       | 90                                            |
| Blood-B          | 27/Female      | 91,515,818             | 9,084                       | 428                                           |

**Table S4. Summary of disease relevant mutations detected in CSF cell free DNA (CSF-cfDNA) by next-generation sequencing.**

| Patient ID | Sample collection date | EGFR                           | TP53                    | ALK                      | KRAS(P21)                                  |
|------------|------------------------|--------------------------------|-------------------------|--------------------------|--------------------------------------------|
| P1         | 20180122               | p.Glu746_Ala750del<br>(25.34%) | p.Trp53Ter<br>(85.47%)  | p.Arg1192Trp<br>(82.66%) | p.Gln61Leu (0.13%),<br>p.Gly138Arg (0.20%) |
| P2         | N/A                    |                                |                         |                          |                                            |
| P4         | 20190307               | p.Leu858Arg<br>(16.09%)        | p.Arg248Gln<br>(44.72%) |                          |                                            |
| P6         | N/A                    |                                |                         |                          |                                            |
| P7         | 20190510               |                                | p.Asp281Tyr<br>(89.72%) |                          |                                            |

p: protein; Numbers in brackets indicate mutation frequencies.
